# Supplementary material for: aristaless1 has a dual role in appendage formation and wing color specification during butterfly development
Source: Springer Nature journal article supplement (doi:10.1186/s12915-023-01601-6), 2023-05-04

Sheet1

| <b>Supplementary Figure 2A - BLOT #1: 5 ug/mL AI1-1</b> |             |                        |                         |                          |
|---------------------------------------------------------|-------------|------------------------|-------------------------|--------------------------|
|                                                         | <b>1</b>    | <b>2</b>               | <b>3</b>                | <b>4</b>                 |
| <b>A</b>                                                | RIPA        | AI1-1 Ab (0.2 ug)      | AI1-1 (0.02 ug)         | AI1-1 (0.002 ug)         |
| <b>B</b>                                                | AI1-1 PIS   | AI1-1 peptide (0.2 ug) | AI1-1 peptide (0.02 ug) | AI1-1 peptide (0.002 ug) |
| <b>C</b>                                                | Wing1 20 uL | Wing1 1X               | Wing1 0.2X              | Wing1 0.05X              |
| <b>D</b>                                                | Wing2 20 uL | Wing2 1X               | Wing2 0.2X              | Wing2 0.05X              |

| <b>Supplementary Figure 2B - BLOT #3: 5 ug/mL AI1-2</b> |             |                        |                         |                          |
|---------------------------------------------------------|-------------|------------------------|-------------------------|--------------------------|
|                                                         | <b>1</b>    | <b>2</b>               | <b>3</b>                | <b>4</b>                 |
| <b>A</b>                                                | RIPA        | AI1-2 Ab (0.2 ug)      | AI1-2 (0.02 ug)         | AI1-2 (0.002 ug)         |
| <b>B</b>                                                | AI1-2 PIS   | AI1-2 peptide (0.2 ug) | AI1-2 peptide (0.02 ug) | AI1-2 peptide (0.002 ug) |
| <b>C</b>                                                | Wing1 20 uL | Wing1 1X               | Wing1 0.2X              | Wing1 0.05X              |
| <b>D</b>                                                | Wing2 20 uL | Wing2 1X               | Wing2 0.2X              | Wing2 0.05X              |

| <b>Supplementary Figure 2C - BLOT #5: NO PRIMARY</b> |             |                        |                         |                          |
|------------------------------------------------------|-------------|------------------------|-------------------------|--------------------------|
|                                                      | <b>1</b>    | <b>2</b>               | <b>3</b>                | <b>4</b>                 |
| <b>A</b>                                             | RIPA        | AI1-1 Ab (0.2 ug)      | AI1-1 (0.02 ug)         | AI1-1 (0.002 ug)         |
| <b>B</b>                                             | AI1-1 PIS   | AI1-1 peptide (0.2 ug) | AI1-1 peptide (0.02 ug) | AI1-1 peptide (0.002 ug) |
| <b>C</b>                                             | blank       | blank                  | blank                   | blank                    |
| <b>D</b>                                             | RIPA        | AI1-2 Ab (0.2 ug)      | AI1-2 (0.02 ug)         | AI1-2 (0.002 ug)         |
| <b>E</b>                                             | AI1-2 PIS   | AI1-2 peptide (0.2 ug) | AI1-2 peptide (0.02 ug) | AI1-2 peptide (0.002 ug) |
| <b>F</b>                                             | Wing1 20 uL | Wing1 1X               | Wing1 0.2X              | Wing1 0.05X              |
| <b>G</b>                                             | Wing2 20 uL | Wing2 1X               | Wing2 0.2X              | Wing2 0.05X              |

**PIS - pre-immune serum**  
**peptide - purified short peptide antigen**

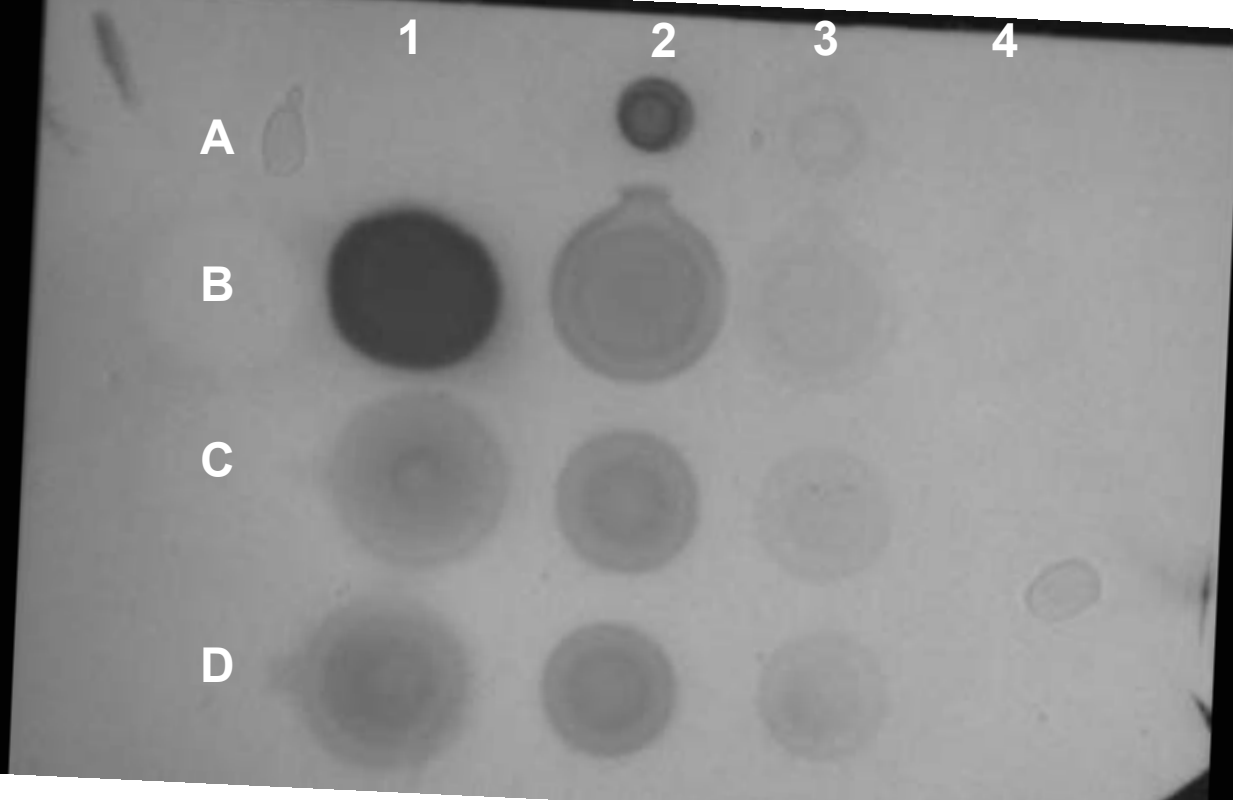

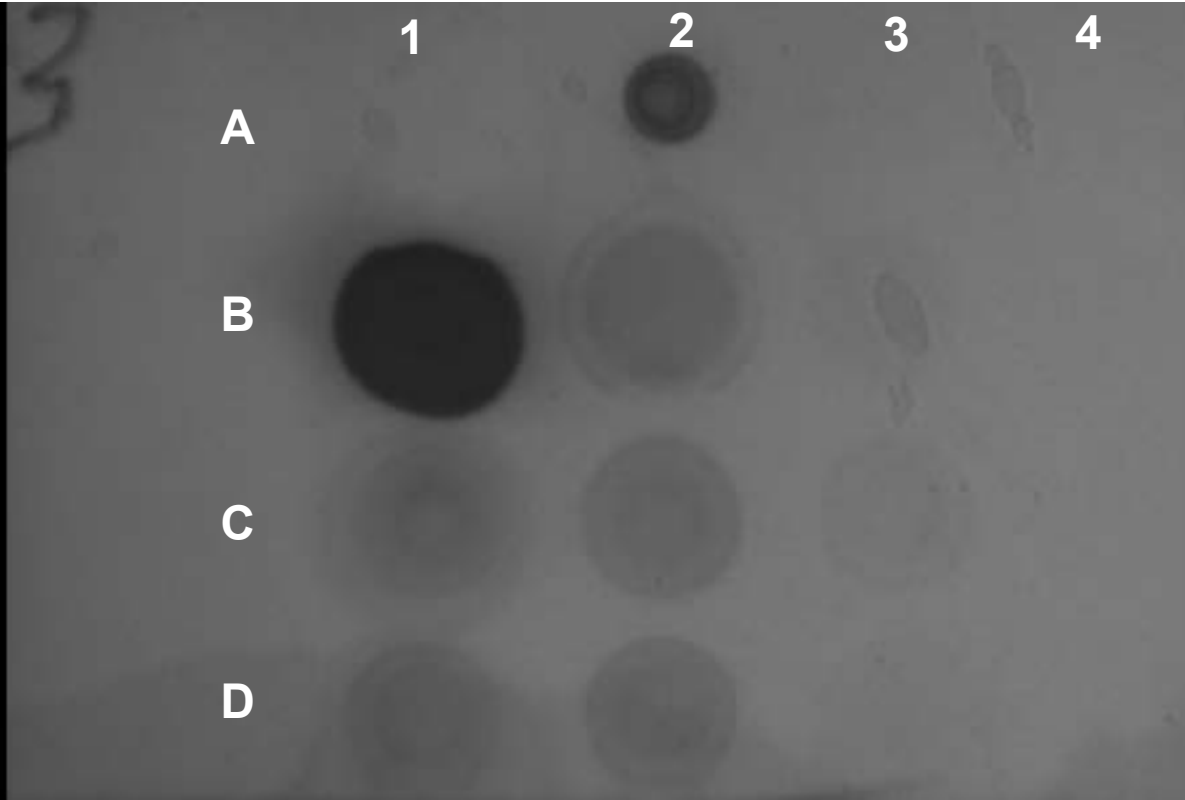

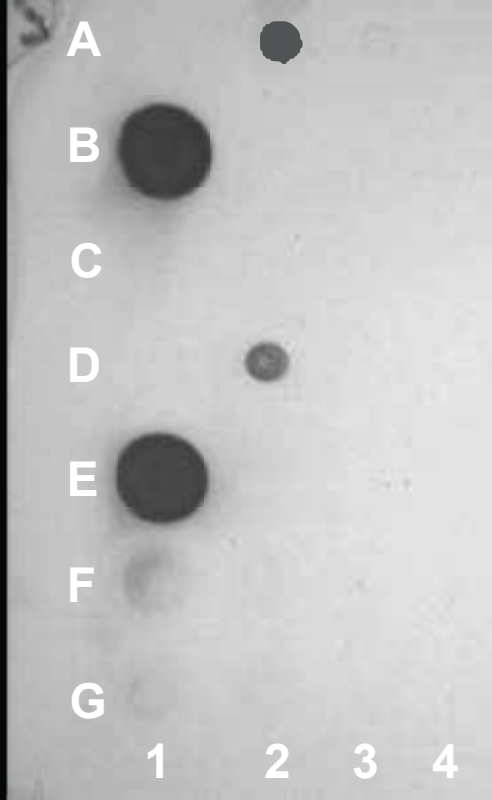

Supplement: MOESM13 [file 12915_2023_1601_MOESM13_ESM.pdf]
