# Supplementary material for: aristaless1 has a dual role in appendage formation and wing color specification during butterfly development
Source: Springer Nature journal article supplement (doi:10.1186/s12915-023-01601-6), 2023-05-04

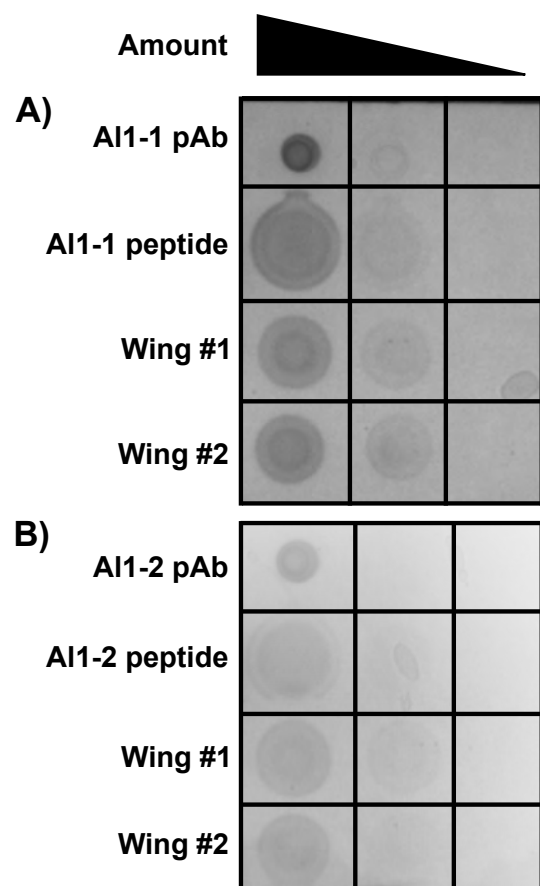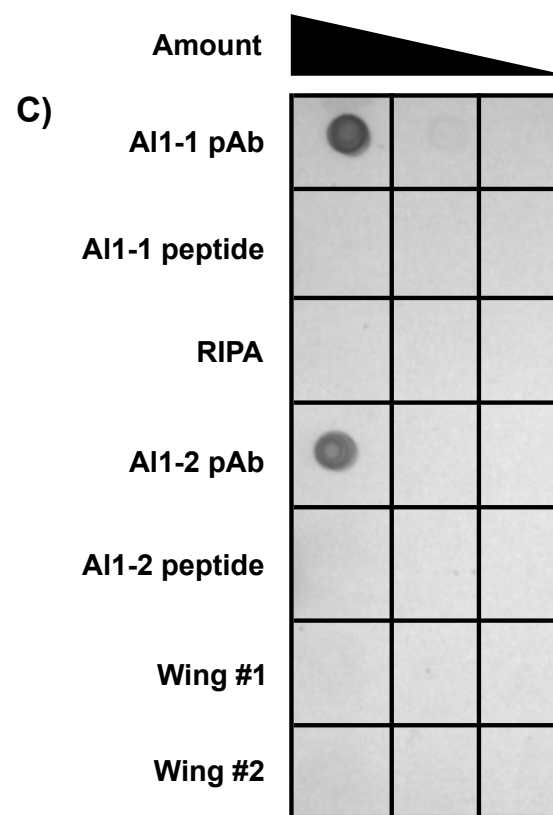

Supplement: MOESM1 [file 12915_2023_1601_MOESM1_ESM.pdf › 12915_2023_1601_MOESM1_ESM.pdf]
