# Supplementary material for: aristaless1 has a dual role in appendage formation and wing color specification during butterfly development
Source: Springer Nature journal article supplement (doi:10.1186/s12915-023-01601-6), 2023-05-04

# Days After Pupa Formation

2

3

4

white *H. cydno*

Dorsal

Ventral

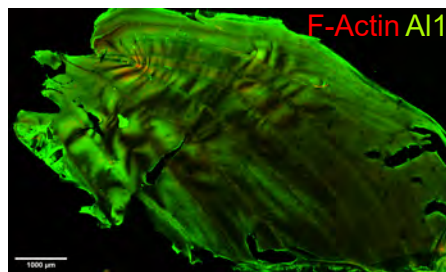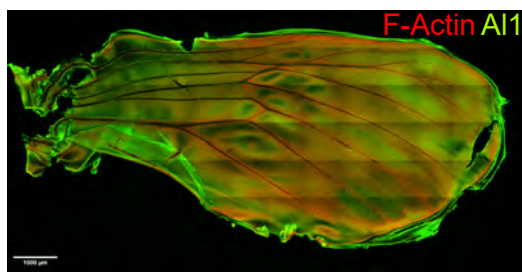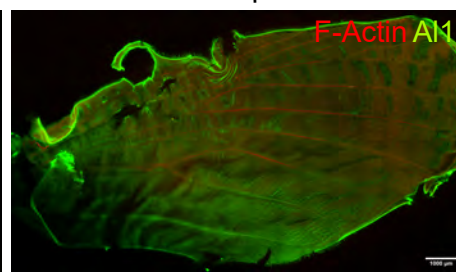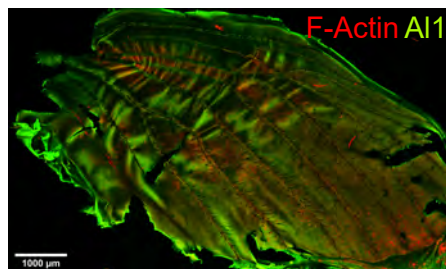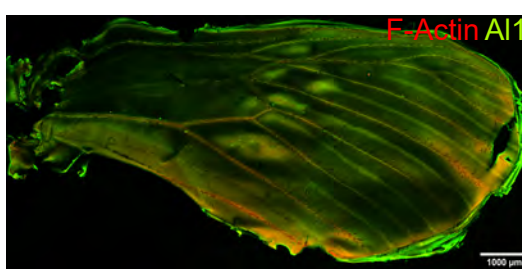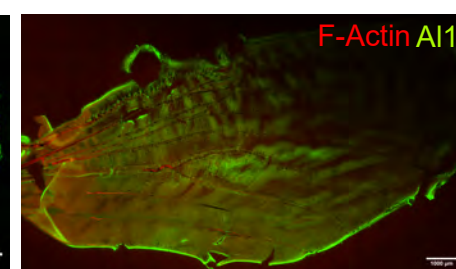

yellow *H. cydno*

Dorsal

Ventral

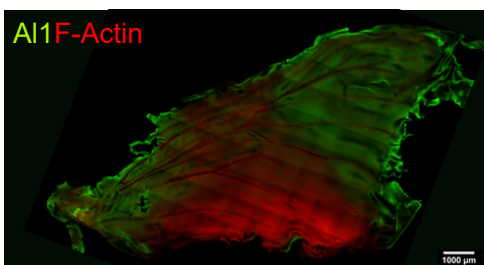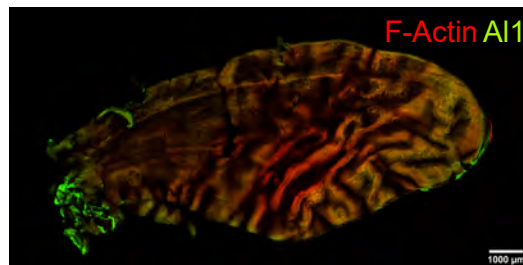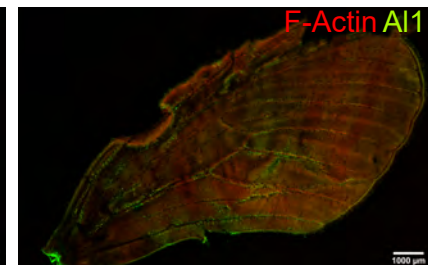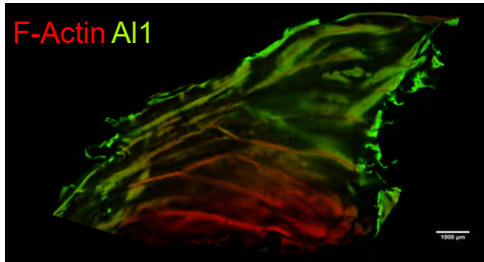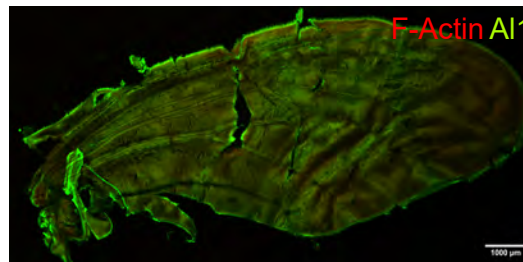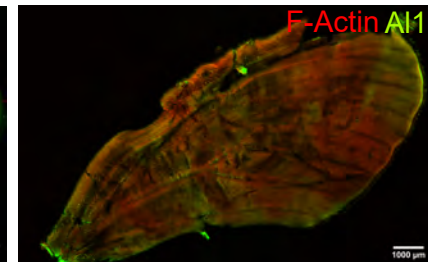

Supplement: MOESM4 [file 12915_2023_1601_MOESM4_ESM.pdf › 12915_2023_1601_MOESM4_ESM.pdf]
