# Supplementary material for: aristaless1 has a dual role in appendage formation and wing color specification during butterfly development
Source: Springer Nature journal article supplement (doi:10.1186/s12915-023-01601-6), 2023-05-04

A

-Al1 white *H. cydno*

Dorsal

Ventral

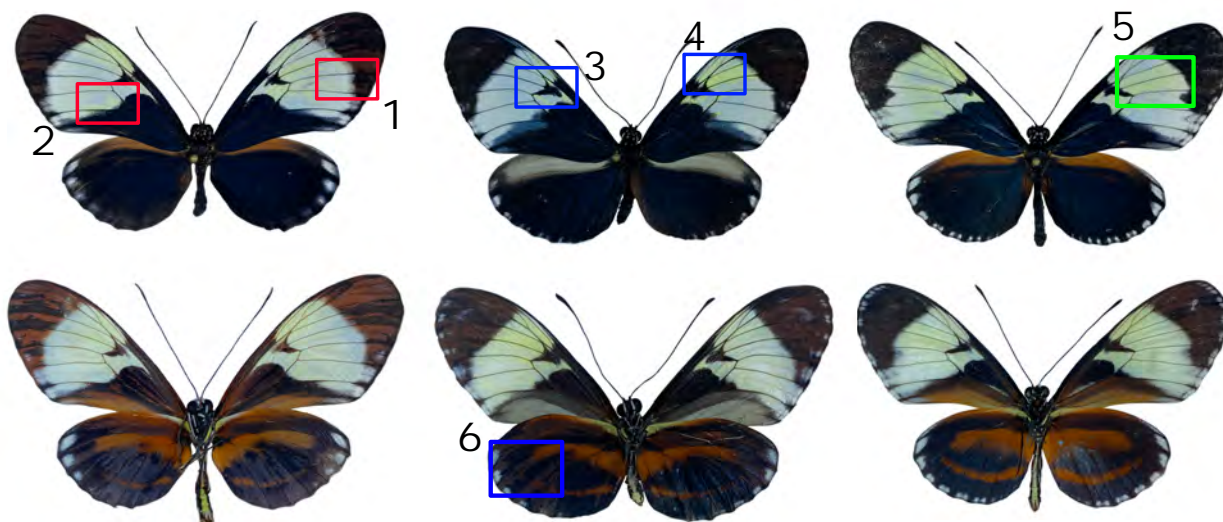

B

Details

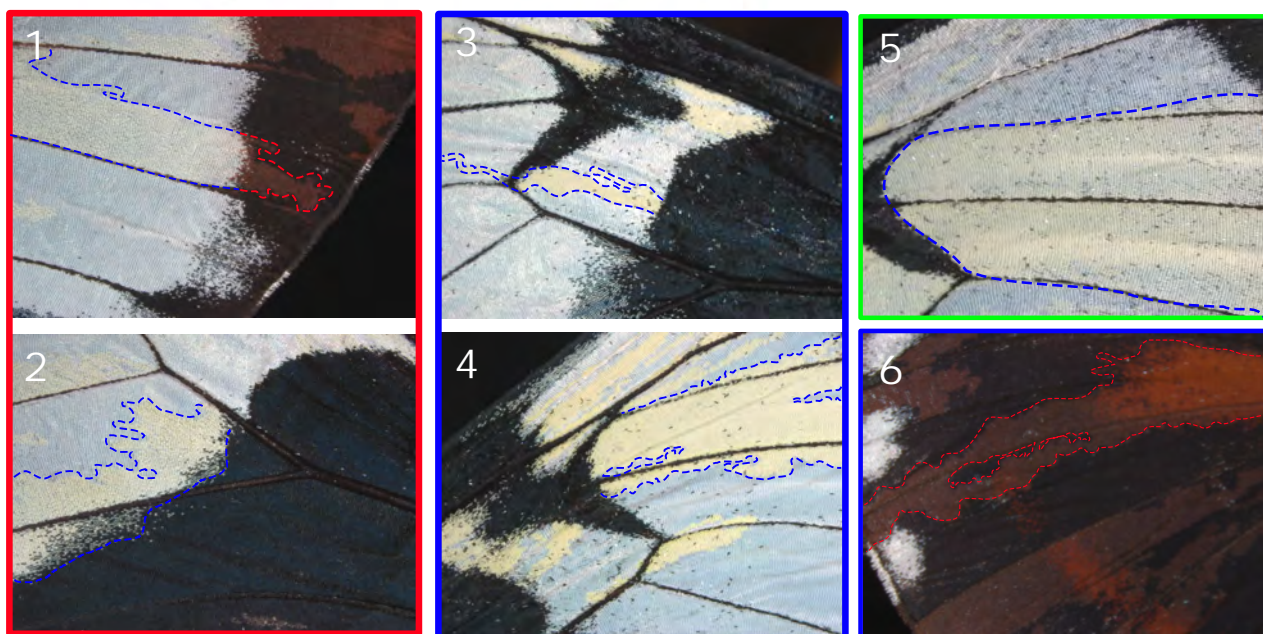

Supplement: MOESM8 [file 12915_2023_1601_MOESM8_ESM.pdf › 12915_2023_1601_MOESM8_ESM.pdf]
