# Supplementary material for: aristaless1 has a dual role in appendage formation and wing color specification during butterfly development
Source: BMC Biol. 2023 May 4;21:100. doi: 10.1186/s12915-023-01601-6 (PMC10161628; doi:10.1186/s12915-023-01601-6)
Supplement: Supplementary file 15 — Additional file 15: Source Data File 3. Raw ΔCq data from our qPCR analysis used to calculate the relative expression of genes of interest. The data from this source file is used to produce the plots in Fig. 7 and Supplement Fig. 9 ad described in the method section. [file 12915_2023_1601_MOESM15_ESM.xlsx]

## Sheet: Full dataset all Cq values
	gene	day	sample	part	color	gene of interest value	ef1g (standard)	deltaCq	relative expression
1	ABC1	4	1	distal	w	28.1888	20.6095	7.57929	0.00522884
2	ABC1	4	1	distal	y	26.9625	18.5102	8.45233	0.00285494
3	ABC1	4	1	mid	w	28.6103	19.9796	8.63068	0.00252295
4	ABC1	4	1	mid	y	26.2393	17.5992	8.64013	0.00250647
5	ABC1	4	1	prox	w	32.0797	23.7434	8.33622	0.00309418
6	ABC1	4	1	prox	y	28.0649	19.5356	8.52928	0.00270663
7	ABC1	4	2	distal	w	30.655	22.9429	7.71215	0.00476884
8	ABC1	4	2	distal	y	30.8811	22.4842	8.3968	0.00296695
9	ABC1	4	2	mid	w	28.8042	21.1398	7.66447	0.00492907
10	ABC1	4	2	mid	y	28.3221	19.4989	8.82322	0.00220774
11	ABC1	4	2	prox	w	34.2334	27.0379	7.19556	0.00682215
12	ABC1	4	2	prox	y	30.2821	21.5663	8.71583	0.00237835
13	ABC1	4	3	distal	w	30.872	22.015	8.85692	0.00215676
14	ABC1	4	3	distal	y	29.974	21.655	8.31909	0.00313116
15	ABC1	4	3	mid	w	32.3732	25.3599	7.01336	0.00774051
16	ABC1	4	3	mid	y	29.3699	21.0657	8.30424	0.00316355
17	ABC1	4	3	prox	w	33.254	25.1688	8.0852	0.00368224
18	ABC1	4	3	prox	y	31.7346	23.4849	8.24965	0.00328556
19	ABC1	6	1	distal	w	29.9826	22.1674	7.81526	0.00443989
20	ABC1	6	1	distal	y	28.2086	20.6461	7.56244	0.00529027
21	ABC1	6	1	mid	w	29.498	21.3898	8.10813	0.00362418
22	ABC1	6	1	mid	y	30.5181	21.906	8.61211	0.00255561
23	ABC1	6	1	prox	w	31.3451	22.9748	8.37036	0.00302184
24	ABC1	6	1	prox	y	30.8206	22.4086	8.41199	0.00293589
25	ABC1	6	2	distal	w	29.2637	21.501	7.7627	0.00460462
26	ABC1	6	2	distal	y	29.5671	23.1867	6.38037	0.0120037
27	ABC1	6	2	mid	w	27.7199	19.2531	8.46681	0.00282642
28	ABC1	6	2	mid	y	30.9455	21.8472	9.09834	0.00182443
29	ABC1	6	2	prox	w	29.9	21.8765	8.02348	0.00384318
30	ABC1	6	2	prox	y	32.4037	24.1064	8.29725	0.0031789
31	ABC1	6	3	distal	w	32.1316	24.3349	7.79678	0.00449713
32	ABC1	6	3	distal	y	32.4201	23.3936	9.02656	0.00191749
33	ABC1	6	3	mid	w	29.2104	20.8769	8.33349	0.00310006
34	ABC1	6	3	mid	y	31.3502	23.5629	7.7873	0.00452677
35	ABC1	6	3	prox	w	30.4947	22.9305	7.56421	0.00528381
36	ABC1	6	3	prox	y	30.1791	22.0411	8.13794	0.00355006
37	ABC1	7	1	distal	w	31.4817	23.707	7.77463	0.00456672
38	ABC1	7	1	distal	y	32.8137	24.548	8.26571	0.00324918
39	ABC1	7	1	mid	w	30.1126	21.3559	8.75675	0.00231183
40	ABC1	7	1	mid	y	28.6782	20.7515	7.92665	0.00410997
41	ABC1	7	1	prox	w	32.8593	25.2515	7.60778	0.0051266
42	ABC1	7	1	prox	y	30.8266	22.9917	7.83488	0.00437991
43	ABC1	7	2	distal	w	32.1515	25.0459	7.10562	0.00726099
44	ABC1	7	2	distal	y	30.2772	24.1457	6.13156	0.0142631
45	ABC1	7	2	mid	w	28.8332	21.4244	7.40882	0.00588468
46	ABC1	7	2	mid	y	27.1715	20.8325	6.33901	0.0123529
47	ABC1	7	2	prox	w	34.2602	28.6834	5.57676	0.0209522
48	ABC1	7	2	prox	y	29.6358	24.0651	5.57064	0.0210412
49	ABC1	7	3	distal	w	31.997	24.2005	7.79648	0.00449808
50	ABC1	7	3	distal	y	34.2904	26.887	7.40345	0.00590664
51	ABC1	7	3	mid	w	29.0173	21.3945	7.62287	0.00507328
52	ABC1	7	3	mid	y	28.8983	21.6225	7.27578	0.00645316
53	ABC1	7	3	prox	w	30.8418	23.493	7.34878	0.00613475
54	ABC1	7	3	prox	y	32.7558	25.9212	6.83456	0.00876176
55	ABC2	4	1	distal	w	23.6519	20.0044	3.64755	0.0797955
56	ABC2	4	1	distal	y	24.2501	18.1373	6.11272	0.0144506
57	ABC2	4	1	mid	w	25.6105	19.7214	5.88919	0.0168724
58	ABC2	4	1	mid	y	24.7001	17.369	7.33117	0.00621008
59	ABC2	4	1	prox	w	29.1662	23.1239	6.04231	0.0151734
60	ABC2	4	1	prox	y	27.0344	19.7374	7.29707	0.00635862
61	ABC2	4	2	distal	w	28.0666	22.6072	5.4594	0.0227277
62	ABC2	4	2	distal	y	28.3928	22.3281	6.06467	0.01494
63	ABC2	4	2	mid	w	27.1572	21.0629	6.09431	0.0146363
64	ABC2	4	2	mid	y	25.0003	19.5388	5.4615	0.0226948
65	ABC2	4	2	prox	w	32.9537	26.9292	6.02446	0.0153623
66	ABC2	4	2	prox	y	27.8277	21.2301	6.59765	0.0103255
67	ABC2	4	3	distal	w	26.305	21.5488	4.75625	0.037002
68	ABC2	4	3	distal	y	27.1555	21.3519	5.8036	0.0179037
69	ABC2	4	3	mid	w	29.4515	24.7976	4.65385	0.0397239
70	ABC2	4	3	mid	y	26.4325	20.5625	5.87001	0.0170982
71	ABC2	4	3	prox	w	30.7065	24.6735	6.03303	0.0152713
72	ABC2	4	3	prox	y	29.1296	22.9514	6.17821	0.0138094
73	ABC2	6	1	distal	w	28.9444	22.1691	6.77529	0.00912922
74	ABC2	6	1	distal	y	26.3982	20.8206	5.57758	0.0209402
75	ABC2	6	1	mid	w	28.3257	21.2976	7.02807	0.00766197
76	ABC2	6	1	mid	y	28.6557	22.0879	6.56773	0.0105419
77	ABC2	6	1	prox	w	30.4546	23.0248	7.42986	0.00579947
78	ABC2	6	1	prox	y	29.215	22.3085	6.90651	0.00833552
79	ABC2	6	2	distal	w	26.6427	21.039	5.60369	0.0205646
80	ABC2	6	2	distal	y	28.5517	22.2542	6.29751	0.0127133
81	ABC2	6	2	mid	w	26.2066	19.3718	6.8348	0.00876031
82	ABC2	6	2	mid	y	29.492	22.0182	7.47384	0.00562534
83	ABC2	6	2	prox	w	28.8366	21.8259	7.01067	0.00775495
84	ABC2	6	2	prox	y	31.2306	24.1926	7.03804	0.00760918
85	ABC2	6	3	distal	w	29.9193	24.6243	5.29501	0.0254709
86	ABC2	6	3	distal	y	30.0994	23.1785	6.92085	0.00825311
87	ABC2	6	3	mid	w	27.3785	21.1036	6.27491	0.0129141
88	ABC2	6	3	mid	y	29.9454	23.4556	6.48986	0.0111265
89	ABC2	6	3	prox	w	28.434	22.7095	5.72452	0.0189125
90	ABC2	6	3	prox	y	29.3504	21.8761	7.4743	0.00562357
91	ABC2	7	1	distal	w	29.1301	23.2505	5.87963	0.0169846
92	ABC2	7	1	distal	y	30.5996	24.4945	6.10517	0.0145265
93	ABC2	7	1	mid	w	27.6628	21.1001	6.56271	0.0105786
94	ABC2	7	1	mid	y	27.0894	21.2703	5.81915	0.0177117
95	ABC2	7	1	prox	w	31.7436	24.627	7.11665	0.0072057
96	ABC2	7	1	prox	y	29.748	22.6399	7.1081	0.00724853
97	ABC2	7	2	distal	w	29.5141	25.3868	4.12723	0.0572243
98	ABC2	7	2	distal	y	27.1933	23.1485	4.04489	0.0605851
99	ABC2	7	2	mid	w	26.3984	21.2993	5.09907	0.0291762
100	ABC2	7	2	mid	y	25.822	20.969	4.85294	0.0346033
101	ABC2	7	2	prox	w	37.6783	29.4105	8.26782	0.00324442
102	ABC2	7	2	prox	y	29.4212	24.4238	4.99737	0.031307
103	ABC2	7	3	distal	w	29.6608	24.0057	5.65506	0.0198453
104	ABC2	7	3	distal	y	31.2125	26.9556	4.2569	0.0523052
105	ABC2	7	3	mid	w	26.6228	20.9781	5.64465	0.019989
106	ABC2	7	3	mid	y	25.5128	21.3163	4.1965	0.0545416
107	ABC2	7	3	prox	w	28.423	23.6512	4.7718	0.0366054
108	ABC2	7	3	prox	y	30.5383	26.0199	4.51841	0.0436337
109	ABC3	4	1	distal	w	28.2848	20.4153	7.86958	0.00427584
110	ABC3	4	1	distal	y	24.8547	18.3837	6.47098	0.011273
111	ABC3	4	1	mid	w	28.1004	19.8151	8.28529	0.00320538
112	ABC3	4	1	mid	y	25.0439	17.4727	7.57129	0.00525792
113	ABC3	4	1	prox	w	29.9402	23.4825	6.45771	0.0113772
114	ABC3	4	1	prox	y	27.0666	19.35	7.71662	0.00475407
115	ABC3	4	2	distal	w	29.5173	22.4705	7.04673	0.00756352
116	ABC3	4	2	distal	y	26.3133	22.33	3.98334	0.0632259
117	ABC3	4	2	mid	w	28.356	20.9809	7.37507	0.00602396
118	ABC3	4	2	mid	y	25.9429	19.3564	6.58651	0.0104055
119	ABC3	4	2	prox	w	30.666	27.1101	3.55587	0.0850309
120	ABC3	4	2	prox	y	27.9813	21.3979	6.58343	0.0104278
121	ABC3	4	3	distal	w	28.7255	21.8922	6.83325	0.00876973
122	ABC3	4	3	distal	y	28.0068	21.3992	6.60759	0.0102546
123	ABC3	4	3	mid	w	30.4823	25.1263	5.35597	0.024417
124	ABC3	4	3	mid	y	27.3722	20.9858	6.38634	0.0119542
125	ABC3	4	3	prox	w	31.7762	24.6612	7.11495	0.00721418
126	ABC3	4	3	prox	y	29.4693	23.3787	6.09059	0.014674
127	ABC3	6	1	distal	w	24.5341	22.1253	2.40878	0.188315
128	ABC3	6	1	distal	y	23.6516	20.7206	2.93099	0.131124
129	ABC3	6	1	mid	w	24.8444	21.3273	3.51716	0.0873435
130	ABC3	6	1	mid	y	25.234	21.9914	3.24258	0.105654
131	ABC3	6	1	prox	w	26.6437	22.8519	3.79179	0.0722034
132	ABC3	6	1	prox	y	26.0679	22.0444	4.02354	0.0614885
133	ABC3	6	2	distal	w	24.957	20.9204	4.03656	0.0609362
134	ABC3	6	2	distal	y	24.9299	23.2863	1.64356	0.320066
135	ABC3	6	2	mid	w	24.2096	18.8512	5.35839	0.0243761
136	ABC3	6	2	mid	y	24.4011	21.8305	2.57063	0.168331
137	ABC3	6	2	prox	w	26.7991	21.6247	5.17438	0.0276921
138	ABC3	6	2	prox	y	27.0214	24.1427	2.87873	0.135961
139	ABC3	6	3	distal	w	26.3377	24.2399	2.09779	0.233615
140	ABC3	6	3	distal	y	25.9105	23.3806	2.52989	0.173152
141	ABC3	6	3	mid	w	24.4072	20.4401	3.9671	0.0639416
142	ABC3	6	3	mid	y	26.5389	23.5817	2.95715	0.128769
143	ABC3	6	3	prox	w	25.7662	22.1249	3.64126	0.0801442
144	ABC3	6	3	prox	y	26.5421	22.0664	4.47572	0.0449442
145	ABC3	7	1	distal	w	26.2377	23.763	2.47468	0.179906
146	ABC3	7	1	distal	y	26.0836	24.5937	1.48994	0.356028
147	ABC3	7	1	mid	w	25.1068	21.4871	3.61978	0.0813462
148	ABC3	7	1	mid	y	24.237	20.7887	3.44823	0.0916174
149	ABC3	7	1	prox	w	27.2731	25.3832	1.88983	0.269839
150	ABC3	7	1	prox	y	25.2645	23.0092	2.25525	0.20946
151	ABC3	7	2	distal	w	24.4267	25.2366	-0.809911	1.7531
152	ABC3	7	2	distal	y	22.4735	24.1564	-1.68282	3.21056
153	ABC3	7	2	mid	w	22.8901	21.41	1.48008	0.358469
154	ABC3	7	2	mid	y	20.9715	20.9203	0.0512465	0.965102
155	ABC3	7	2	prox	w	NaN	NaN	NaN	NaN
156	ABC3	7	2	prox	y	22.2103	24.0965	-1.8862	3.69661
157	ABC3	7	3	distal	w	25.1771	24.1382	1.03895	0.486683
158	ABC3	7	3	distal	y	26.6973	27.1258	-0.428483	1.34582
159	ABC3	7	3	mid	w	25.353	21.5219	3.83113	0.070261
160	ABC3	7	3	mid	y	24.613	21.7376	2.87535	0.13628
161	ABC3	7	3	prox	w	26.2437	23.4875	2.75618	0.148015
162	ABC3	7	3	prox	y	27.1581	25.9508	1.20732	0.433071
163	cinnabar	4	1	distal	w	29.5238	20.8575	8.66629	0.00246143
164	cinnabar	4	1	distal	y	24.4381	18.8394	5.59874	0.0206353
165	cinnabar	4	1	mid	w	25.04	20.2424	4.79759	0.0359568
166	cinnabar	4	1	mid	y	24.3836	17.8263	6.55736	0.0106179
167	cinnabar	4	1	prox	w	30.3956	23.9948	6.40083	0.0118347
168	cinnabar	4	1	prox	y	26.1505	19.7653	6.38514	0.0119641
169	cinnabar	4	2	distal	w	25.387	23.1163	2.27072	0.207227
170	cinnabar	4	2	distal	y	21.1754	22.9852	-1.80986	3.50608
171	cinnabar	4	2	mid	w	25.5806	21.2749	4.30575	0.0505638
172	cinnabar	4	2	mid	y	20.2847	19.7667	0.518055	0.698313
173	cinnabar	4	2	prox	w	NaN	NaN	NaN	NaN
174	cinnabar	4	2	prox	y	24.1755	21.9561	2.21935	0.214738
175	cinnabar	4	3	distal	w	23.6776	22.297	1.38059	0.384062
176	cinnabar	4	3	distal	y	23.4828	21.9172	1.5656	0.337838
177	cinnabar	4	3	mid	w	26.2767	25.5878	0.688901	0.620326
178	cinnabar	4	3	mid	y	23.0789	21.3057	1.77312	0.292576
179	cinnabar	4	3	prox	w	25.7676	25.3631	0.404454	0.755522
180	cinnabar	4	3	prox	y	24.1437	23.8013	0.342422	0.788716
181	cinnabar	6	1	distal	w	24.485	22.6004	1.88466	0.270808
182	cinnabar	6	1	distal	y	24.1501	21.1848	2.96524	0.128049
183	cinnabar	6	1	mid	w	24.4547	21.6813	2.77343	0.146256
184	cinnabar	6	1	mid	y	23.1593	22.3556	0.803689	0.572882
185	cinnabar	6	1	prox	w	26.5389	23.6017	2.93714	0.130567
186	cinnabar	6	1	prox	y	24.9303	22.4705	2.45971	0.181783
187	cinnabar	6	2	distal	w	22.8677	21.3857	1.48204	0.357983
188	cinnabar	6	2	distal	y	22.6224	23.784	-1.16156	2.23699
189	cinnabar	6	2	mid	w	24.4527	19.603	4.84963	0.0346829
190	cinnabar	6	2	mid	y	21.7181	22.3586	-0.640566	1.55894
191	cinnabar	6	2	prox	w	25.5947	22.2161	3.37859	0.0961489
192	cinnabar	6	2	prox	y	26.8113	24.7736	2.03771	0.243551
193	cinnabar	6	3	distal	w	24.2763	24.625	-0.348692	1.27341
194	cinnabar	6	3	distal	y	25.3887	23.9286	1.46017	0.36345
195	cinnabar	6	3	mid	w	24.6469	21.0543	3.59257	0.0828949
196	cinnabar	6	3	mid	y	24.4253	24.1386	0.286651	0.819803
197	cinnabar	6	3	prox	w	31.9738	22.8032	9.17061	0.00173529
198	cinnabar	6	3	prox	y	24.4342	22.3683	2.06592	0.238834
199	cinnabar	7	1	distal	w	25.0474	23.8628	1.18463	0.439937
200	cinnabar	7	1	distal	y	29.4908	24.7105	4.78026	0.0363913
201	cinnabar	7	1	mid	w	30.16	21.4855	8.67447	0.0024475
202	cinnabar	7	1	mid	y	22.5923	20.9586	1.63368	0.322266
203	cinnabar	7	1	prox	w	31.3028	25.4738	5.82897	0.0175916
204	cinnabar	7	1	prox	y	31.1987	23.0477	8.15095	0.00351818
205	cinnabar	7	2	distal	w	27.1606	25.1811	1.97953	0.253573
206	cinnabar	7	2	distal	y	29.9453	24.2572	5.68809	0.0193961
207	cinnabar	7	2	mid	w	23.2315	21.5505	1.68105	0.311856
208	cinnabar	7	2	mid	y	25.647	21.0317	4.61531	0.0407994
209	cinnabar	7	2	prox	w	30.2119	28.7453	1.46656	0.361844
210	cinnabar	7	2	prox	y	29.8718	24.2578	5.61402	0.0204179
211	cinnabar	7	3	distal	w	NaN	NaN	NaN	NaN
212	cinnabar	7	3	distal	y	31.1	27.1414	3.95857	0.0643207
213	cinnabar	7	3	mid	w	24.8141	21.5762	3.23795	0.105994
214	cinnabar	7	3	mid	y	23.3691	21.731	1.63811	0.321277
215	cinnabar	7	3	prox	w	27.3025	23.7351	3.5674	0.0843539
216	cinnabar	7	3	prox	y	31.6046	25.8985	5.70614	0.019155
217	karmoisin	4	1	distal	w	27.3387	19.3537	7.985	0.00394707
218	karmoisin	4	1	distal	y	24.3045	17.5178	6.78669	0.00905736
219	karmoisin	4	1	mid	w	25.7355	18.9945	6.74093	0.0093493
220	karmoisin	4	1	mid	y	23.9029	16.4302	7.47269	0.00562985
221	karmoisin	4	1	prox	w	28.8308	22.5747	6.25615	0.0130831
222	karmoisin	4	1	prox	y	26.2736	18.4725	7.80111	0.00448365
223	karmoisin	4	2	distal	w	27.3676	21.6746	5.69304	0.0193296
224	karmoisin	4	2	distal	y	22.6516	21.3819	1.26971	0.414744
225	karmoisin	4	2	mid	w	26.5104	19.9364	6.57402	0.010496
226	karmoisin	4	2	mid	y	22.3308	18.4005	3.93025	0.065596
227	karmoisin	4	2	prox	w	27.3633	25.8416	1.52164	0.348291
228	karmoisin	4	2	prox	y	26.3136	20.5638	5.74984	0.0185835
229	karmoisin	4	3	distal	w	25.3661	20.888	4.4781	0.0448703
230	karmoisin	4	3	distal	y	24.4562	20.4608	3.99543	0.0626982
231	karmoisin	4	3	mid	w	28.3247	24.2119	4.11279	0.0577997
232	karmoisin	4	3	mid	y	23.6334	19.9238	3.70965	0.0764336
233	karmoisin	4	3	prox	w	28.2436	23.9404	4.30316	0.0506547
234	karmoisin	4	3	prox	y	25.9241	22.3618	3.56229	0.0846535
235	karmoisin	6	1	distal	w	26.9756	21.9226	5.053	0.0301228
236	karmoisin	6	1	distal	y	25.4957	20.4672	5.02852	0.0306384
237	karmoisin	6	1	mid	w	26.4003	21.0989	5.30135	0.0253591
238	karmoisin	6	1	mid	y	24.3628	21.7274	2.63541	0.160939
239	karmoisin	6	1	prox	w	28.6136	22.9488	5.66481	0.0197117
240	karmoisin	6	1	prox	y	26.2277	21.9196	4.3081	0.0504814
241	karmoisin	6	2	distal	w	25.148	20.7125	4.43558	0.0462124
242	karmoisin	6	2	distal	y	24.5341	23.2586	1.27546	0.413092
243	karmoisin	6	2	mid	w	25.5742	18.9777	6.59648	0.0103338
244	karmoisin	6	2	mid	y	23.2084	21.7956	1.41283	0.375574
245	karmoisin	6	2	prox	w	27.7381	21.5036	6.23445	0.0132814
246	karmoisin	6	2	prox	y	28.2487	24.2813	3.96741	0.0639281
247	karmoisin	6	3	distal	w	26.3229	23.9216	2.40121	0.189306
248	karmoisin	6	3	distal	y	27.4068	23.2382	4.16861	0.0556063
249	karmoisin	6	3	mid	w	26.215	20.4561	5.75883	0.0184679
250	karmoisin	6	3	mid	y	26.5973	23.4216	3.17565	0.110671
251	karmoisin	6	3	prox	w	29.0284	22.2101	6.81825	0.00886137
252	karmoisin	6	3	prox	y	26.5326	21.9128	4.61981	0.0406723
253	karmoisin	7	1	distal	w	27.6174	23.0712	4.54618	0.0428019
254	karmoisin	7	1	distal	y	31.5494	23.9649	7.58451	0.00520998
255	karmoisin	7	1	mid	w	28.5714	20.7727	7.79866	0.00449128
256	karmoisin	7	1	mid	y	28.4037	20.2305	8.17325	0.00346424
257	karmoisin	7	1	prox	w	30.5085	24.6458	5.86278	0.0171841
258	karmoisin	7	1	prox	y	28.8873	22.3464	6.54093	0.0107395
259	karmoisin	7	2	distal	w	29.7039	24.3362	5.3677	0.0242193
260	karmoisin	7	2	distal	y	31.6143	23.5974	8.01685	0.0038609
261	karmoisin	7	2	mid	w	28.1372	20.7821	7.35516	0.00610768
262	karmoisin	7	2	mid	y	29.1868	20.2065	8.98025	0.00198004
263	karmoisin	7	2	prox	w	30.512	28.0069	2.50505	0.176159
264	karmoisin	7	2	prox	y	29.5158	23.5482	5.9676	0.0159799
265	karmoisin	7	3	distal	w	27.1411	24.4744	2.6667	0.157487
266	karmoisin	7	3	distal	y	32.4335	26.3122	6.12129	0.0143651
267	karmoisin	7	3	mid	w	28.1703	20.9517	7.21855	0.00671428
268	karmoisin	7	3	mid	y	27.9659	21.0888	6.87713	0.00850704
269	karmoisin	7	3	prox	w	29.0684	23.0515	6.01697	0.0154423
270	karmoisin	7	3	prox	y	30.88	25.1981	5.68189	0.0194796
271	Kf	4	1	distal	w	27.2693	20.9227	6.34655	0.0122885
272	Kf	4	1	distal	y	26.0558	18.9031	7.15277	0.00702753
273	Kf	4	1	mid	w	27.2814	20.2483	7.03309	0.00763537
274	Kf	4	1	mid	y	24.2484	17.905	6.34345	0.0123149
275	Kf	4	1	prox	w	30.0603	24.0189	6.0414	0.015183
276	Kf	4	1	prox	y	25.3718	19.7868	5.58509	0.0208315
277	Kf	4	2	distal	w	30.7792	23.1409	7.63829	0.00501934
278	Kf	4	2	distal	y	29.3484	23.0444	6.30408	0.0126556
279	Kf	4	2	mid	w	29.6057	21.3332	8.27241	0.00323412
280	Kf	4	2	mid	y	26.3868	19.8648	6.52201	0.0108813
281	Kf	4	2	prox	w	32.7678	27.28	5.48782	0.0222845
282	Kf	4	2	prox	y	28.3126	22.1171	6.19553	0.0136446
283	Kf	4	3	distal	w	29.5502	22.338	7.21219	0.00674396
284	Kf	4	3	distal	y	32.7709	21.8845	10.8864	0.000528298
285	Kf	4	3	mid	w	31.8817	25.645	6.23666	0.0132611
286	Kf	4	3	mid	y	32.475	21.4025	11.0725	0.000464343
287	Kf	4	3	prox	w	32.2342	25.3417	6.89248	0.00841701
288	Kf	4	3	prox	y	32.8335	23.8332	9.00032	0.00195269
289	Kf	6	1	distal	w	29.0265	22.5946	6.43186	0.0115829
290	Kf	6	1	distal	y	30.7556	21.1669	9.58868	0.00129874
291	Kf	6	1	mid	w	28.3529	21.59	6.76288	0.0092081
292	Kf	6	1	mid	y	32.0247	22.4256	9.59904	0.00128944
293	Kf	6	1	prox	w	30.6842	23.6853	6.99893	0.00781831
294	Kf	6	1	prox	y	31.6583	22.4864	9.17194	0.00173369
295	Kf	6	2	distal	w	28.3261	21.3669	6.95921	0.00803652
296	Kf	6	2	distal	y	31.3869	23.9761	7.41079	0.00587663
297	Kf	6	2	mid	w	26.3818	19.7325	6.64929	0.00996244
298	Kf	6	2	mid	y	29.8106	22.3017	7.50888	0.00549039
299	Kf	6	2	prox	w	28.1384	22.2227	5.91571	0.0165651
300	Kf	6	2	prox	y	31.1834	24.8121	6.37125	0.0120799
301	Kf	6	3	distal	w	27.8234	24.6915	3.13192	0.114077
302	Kf	6	3	distal	y	32.0688	23.7903	8.27859	0.00322031
303	Kf	6	3	mid	w	24.5677	21.0074	3.56028	0.0847713
304	Kf	6	3	mid	y	31.2599	24.1417	7.11821	0.00719788
305	Kf	6	3	prox	w	27.9356	22.8944	5.04127	0.0303687
306	Kf	6	3	prox	y	30.255	22.5151	7.73995	0.0046778
307	Kf	7	1	distal	w	30.421	24.1297	6.29134	0.0127678
308	Kf	7	1	distal	y	29.1787	25.0004	4.17828	0.0552347
309	Kf	7	1	mid	w	28.7179	21.707	7.01089	0.00775375
310	Kf	7	1	mid	y	25.3933	21.0687	4.32455	0.0499092
311	Kf	7	1	prox	w	31.6947	25.6913	6.00345	0.0155877
312	Kf	7	1	prox	y	28.1236	23.2094	4.91422	0.0331644
313	Kf	7	2	distal	w	27.2668	25.371	1.89581	0.268722
314	Kf	7	2	distal	y	25.3994	24.4968	0.902608	0.534919
315	Kf	7	2	mid	w	24.8802	21.8441	3.03608	0.121912
316	Kf	7	2	mid	y	25.322	21.2943	4.02767	0.0613127
317	Kf	7	2	prox	w	30.8499	28.9801	1.86988	0.273596
318	Kf	7	2	prox	y	27.9616	24.3702	3.59142	0.0829609
319	Kf	7	3	distal	w	24.279	24.8288	-0.549803	1.46389
320	Kf	7	3	distal	y	30.48	27.3205	3.15951	0.111916
321	Kf	7	3	mid	w	23.2483	21.8692	1.37914	0.384447
322	Kf	7	3	mid	y	25.3569	21.9757	3.38124	0.095972
323	Kf	7	3	prox	w	25.8975	23.9935	1.90402	0.267198
324	Kf	7	3	prox	y	29.7081	26.1192	3.58888	0.0831073
325	scarlet	4	1	distal	w	29.7763	20.8417	8.93453	0.00204381
326	scarlet	4	1	distal	y	24.7971	18.8845	5.91268	0.0166
327	scarlet	4	1	mid	w	25.5169	20.2341	5.28279	0.0256875
328	scarlet	4	1	mid	y	25.0414	17.9341	7.10727	0.0072527
329	scarlet	4	1	prox	w	30.2943	23.9659	6.3284	0.012444
330	scarlet	4	1	prox	y	25.9343	19.7927	6.14161	0.0141642
331	scarlet	4	2	distal	w	25.8536	23.1182	2.73539	0.150164
332	scarlet	4	2	distal	y	22.6095	22.9974	-0.387928	1.30851
333	scarlet	4	2	mid	w	26.1914	21.2997	4.89173	0.0336855
334	scarlet	4	2	mid	y	22.5642	19.8106	2.75361	0.148279
335	scarlet	4	2	prox	w	26.0284	27.2185	-1.19015	2.28176
336	scarlet	4	2	prox	y	25.5879	22.0653	3.52261	0.0870139
337	scarlet	4	3	distal	w	24.8433	22.3763	2.46703	0.180864
338	scarlet	4	3	distal	y	24.0588	21.9338	2.12498	0.229255
339	scarlet	4	3	mid	w	27.0511	25.6211	1.43008	0.371112
340	scarlet	4	3	mid	y	23.6135	21.3775	2.23605	0.212266
341	scarlet	4	3	prox	w	26.5685	25.2896	1.2789	0.412109
342	scarlet	4	3	prox	y	24.4564	23.9115	0.544912	0.685433
343	scarlet	6	1	distal	w	25.5837	22.7248	2.85891	0.137842
344	scarlet	6	1	distal	y	24.8513	21.1485	3.70275	0.0767998
345	scarlet	6	1	mid	w	25.6424	21.7283	3.91411	0.066334
346	scarlet	6	1	mid	y	23.9294	22.3578	1.57156	0.336445
347	scarlet	6	1	prox	w	27.0624	23.7169	3.34556	0.0983751
348	scarlet	6	1	prox	y	25.3705	22.5101	2.86039	0.137701
349	scarlet	6	2	distal	w	24.153	21.382	2.77095	0.146508
350	scarlet	6	2	distal	y	23.5783	23.9185	-0.340224	1.26595
351	scarlet	6	2	mid	w	25.756	19.6309	6.12515	0.0143267
352	scarlet	6	2	mid	y	23.0972	22.533	0.564171	0.676344
353	scarlet	6	2	prox	w	26.6469	22.2028	4.44413	0.0459393
354	scarlet	6	2	prox	y	27.2935	24.9804	2.31313	0.201223
355	scarlet	6	3	distal	w	25.3848	24.8753	0.509566	0.702434
356	scarlet	6	3	distal	y	26.0858	23.8825	2.20331	0.217139
357	scarlet	6	3	mid	w	26.0446	21.196	4.8485	0.0347102
358	scarlet	6	3	mid	y	25.1684	24.2001	0.968263	0.511121
359	scarlet	6	3	prox	w	33.2087	23.028	10.1806	0.000861642
360	scarlet	6	3	prox	y	25.4141	22.5149	2.89923	0.134044
361	scarlet	7	1	distal	w	26.0723	23.8391	2.23315	0.212693
362	scarlet	7	1	distal	y	31.808	24.6099	7.19812	0.00681002
363	scarlet	7	1	mid	w	34.6373	21.3075	13.3298	9.71279e-05
364	scarlet	7	1	mid	y	31.6048	20.861	10.7438	0.000583165
365	scarlet	7	1	prox	w	31.1355	25.3154	5.82011	0.0176999
366	scarlet	7	1	prox	y	34.773	23.0354	11.7376	0.000292839
367	scarlet	7	2	distal	w	27.1546	25.1014	2.05317	0.240955
368	scarlet	7	2	distal	y	34.3749	24.1728	10.2021	0.000848939
369	scarlet	7	2	mid	w	35.2141	21.4183	13.7958	7.03144e-05
370	scarlet	7	2	mid	y	33.7888	20.8951	12.8937	0.000131405
371	scarlet	7	2	prox	w	30.0598	28.4298	1.62992	0.323105
372	scarlet	7	2	prox	y	36.2248	24.2588	11.966	0.000249968
373	scarlet	7	3	distal	w	NaN	NaN	NaN	NaN
374	scarlet	7	3	distal	y	34.9371	27.0502	7.88682	0.00422504
375	scarlet	7	3	mid	w	26.495	21.4816	5.01345	0.0309599
376	scarlet	7	3	mid	y	29.6969	21.7762	7.92069	0.00412701
377	scarlet	7	3	prox	w	28.5253	23.7157	4.80957	0.0356594
378	scarlet	7	3	prox	y	31.7086	25.8489	5.85963	0.0172217
379	white	4	1	distal	w	29.2981	20.5545	8.74364	0.00233293
380	white	4	1	distal	y	30.2872	18.543	11.7442	0.000291509
381	white	4	1	mid	w	26.5485	20.1081	6.44045	0.0115141
382	white	4	1	mid	y	30.0434	17.454	12.5894	0.000162257
383	white	4	1	prox	w	29.9314	23.3362	6.59527	0.0103425
384	white	4	1	prox	y	32.531	19.9037	12.6273	0.000158052
385	white	4	2	distal	w	27.5669	22.5139	5.053	0.0301227
386	white	4	2	distal	y	23.568	22.7046	0.8634	0.549655
387	white	4	2	mid	w	27.8627	21.2085	6.65421	0.00992848
388	white	4	2	mid	y	22.7408	19.5225	3.21826	0.10745
389	white	4	2	prox	w	28.2684	27.265	1.00333	0.498849
390	white	4	2	prox	y	26.5028	21.6713	4.83145	0.0351228
391	white	4	3	distal	w	26.1136	21.7001	4.41351	0.0469248
392	white	4	3	distal	y	25.245	21.6681	3.57689	0.0838011
393	white	4	3	mid	w	29.0024	25.1515	3.85101	0.0692998
394	white	4	3	mid	y	24.2378	21.1382	3.0996	0.116662
395	white	4	3	prox	w	28.6194	24.8598	3.75953	0.0738359
396	white	4	3	prox	y	26.3247	23.6628	2.66189	0.158012
397	white	6	1	distal	w	25.9717	22.5806	3.39112	0.0953175
398	white	6	1	distal	y	28.1093	21.2063	6.90299	0.00835591
399	white	6	1	mid	w	26.3012	21.5683	4.73281	0.0376083
400	white	6	1	mid	y	26.84	22.3824	4.45757	0.0455132
401	white	6	1	prox	w	28.7437	23.6753	5.06841	0.0298027
402	white	6	1	prox	y	35.3459	22.997	12.3488	0.000191703
403	white	6	2	distal	w	25.42	21.2865	4.13354	0.0569747
404	white	6	2	distal	y	25.1315	23.8965	1.23498	0.424849
405	white	6	2	mid	w	25.4024	19.8054	5.59705	0.0206596
406	white	6	2	mid	y	24.3823	22.3449	2.03743	0.243598
407	white	6	2	prox	w	27.0573	22.1663	4.89097	0.0337033
408	white	6	2	prox	y	29.4004	24.5312	4.86928	0.0342138
409	white	6	3	distal	w	26.257	24.661	1.59605	0.330782
410	white	6	3	distal	y	26.6675	24.0965	2.57099	0.168289
411	white	6	3	mid	w	25.1707	21.8212	3.34949	0.0981076
412	white	6	3	mid	y	26.1966	24.1999	1.99671	0.250571
413	white	6	3	prox	w	28.6752	22.7806	5.89464	0.0168089
414	white	6	3	prox	y	26.6839	22.4414	4.2425	0.0528298
415	white	7	1	distal	w	28.305	23.7685	4.53646	0.0430913
416	white	7	1	distal	y	28.4905	24.8995	3.591	0.0829852
417	white	7	1	mid	w	29.8464	21.6538	8.19264	0.00341798
418	white	7	1	mid	y	27.1532	21.2069	5.94623	0.0162184
419	white	7	1	prox	w	31.8071	26.1871	5.62005	0.0203328
420	white	7	1	prox	y	29.7879	23.3138	6.47401	0.0112493
421	white	7	2	distal	w	27.7921	25.4713	2.32083	0.200152
422	white	7	2	distal	y	30.1722	24.8461	5.32613	0.0249272
423	white	7	2	mid	w	25.7397	22.4479	3.29187	0.102105
424	white	7	2	mid	y	28.8365	21.476	7.3606	0.00608469
425	white	7	2	prox	w	29.2497	23.5047	5.74502	0.0186456
426	white	7	2	prox	y	29.0481	25.0249	4.02318	0.0615038
427	white	7	3	distal	w	30.7669	24.4575	6.30942	0.0126088
428	white	7	3	distal	y	31.5611	27.5787	3.98242	0.0632661
429	white	7	3	mid	w	27.1196	21.6507	5.46887	0.022579
430	white	7	3	mid	y	28.7782	21.749	7.02929	0.00765548
431	white	7	3	prox	w	29.4353	24.3493	5.08602	0.0294411
432	white	7	3	prox	y	32.1288	26.7274	5.40133	0.0236613
